# Supplementary material for: Conifers Phytochemicals: A Valuable Forest with Therapeutic Potential
Source: MDPI journal article supplement (doi:10.3390/molecules26103005), 2021-05-18
Supplement: s1 [file s1]

Table S1. Antiviral, antibacterial and antifungal activity of different conifers' extracts

| Conifer spp.                  | Part Used | Nature of Extract                     | Compounds          | <i>In vitro</i> and <i>in vivo</i> Model                                                          | Extract Conc./ MIC/MBC       | Temp. and Duration      | Main effects                                                                                                                                            | References |
|-------------------------------|-----------|---------------------------------------|--------------------|---------------------------------------------------------------------------------------------------|------------------------------|-------------------------|---------------------------------------------------------------------------------------------------------------------------------------------------------|------------|
| <i>Araucaria angustifolia</i> | Leaves    | Hydroethanolic extract                | Biflavonoids       | Vero cells lines                                                                                  | IC <sub>50</sub> 46.82 µg/mL | 37°C, 2 h               | hydroethanol extract n-butanol (NB1) fractions displayed best antiherpetic activity against Herpes Simplex Virus                                        | [1]        |
| <i>A. cookii</i>              | Leaves    | Methanol, chloroform, petroleum ether | Phenolic compounds | <i>Psudomonas</i> spp.,<br><i>Klebshiela</i> spp.;<br><i>Aspergillus flavus</i> , <i>A. niger</i> | 1000 µg/mL                   | 37°C, 24h;<br>28°C, 24h | Extracts exhibited good activity against all bacterial spp. with inhibition zone 7 mm but do not displayed any activity against <i>Aspergillus</i> spp. | [2]        |
| <i>A. cunninghamii</i>        | Leaves    | Methanol                              | Phenolic compounds | <i>Erwinia chrysanthemi</i>                                                                       | 125/250 µg/mL                | 37°C, 24h               | Methanol extract have potential against all bacteria spp. as it shows inhibition range range activity from 54 % to 81%                                  | [3]        |
|                               |           |                                       |                    | <i>Bacillus subtilis</i>                                                                          | 62.5/125 µg/mL               | 37°C, 24h               |                                                                                                                                                         |            |
|                               |           |                                       |                    | <i>Escherichia coli</i>                                                                           | 62.5/250 µg/mL               | 37°C, 24h               |                                                                                                                                                         |            |
|                               |           |                                       |                    | <i>Xanthomonas phaseoli</i>                                                                       | 31.25/125 µg/mL              | 37°C, 24h               |                                                                                                                                                         |            |
|                               | Leaves    | Ethanol                               | Phenolic compounds | <i>B. subtilis</i>                                                                                | 62.5/125 µg/mL               | 37°C, 24h               | While ethanol extract inhibition range from 45-72%.                                                                                                     |            |
|                               |           |                                       |                    | <i>Agarobacterium tumefaciens</i>                                                                 | 31.25/125 µg/mL              | 37°C, 24h               |                                                                                                                                                         |            |
|                               |           |                                       |                    | <i>E. coli</i>                                                                                    | 62.5/250 µg/mL               | 37°C, 24h               |                                                                                                                                                         |            |
|                               |           |                                       |                    | <i>X. phaseoli</i>                                                                                | 125/500 µg/mL                | 37°C, 24h               |                                                                                                                                                         |            |
| <i>Biota orientalis</i> Endl  | Leaves    | Methanol                              | Phenolic compounds | <i>A. tumefaciens</i>                                                                             | 125/na µg/mL                 | 37°C, 24h               | Methanol extract shows potency against all the bacteria with activity range from 54 % to 81% however, ethanol extract activity ranges from 45-72%.      | [3]        |
|                               |           |                                       |                    | <i>B. subtilis</i>                                                                                | 62.5/125 µg/mL               | 37°C, 24h               |                                                                                                                                                         |            |
|                               |           |                                       |                    | <i>E. chrysanthemi</i>                                                                            | 62.5/250 µg/mL               | 37°C, 24h               |                                                                                                                                                         |            |
|                               |           |                                       |                    | <i>E. coli</i>                                                                                    | NF                           | 37°C, 24h               |                                                                                                                                                         |            |
|                               |           | Ethanol                               | Phenolic compounds | <i>X. phaseoli</i>                                                                                | 125/500 µg/mL                | 37°C, 24h               |                                                                                                                                                         |            |
|                               |           |                                       |                    | <i>E. coli</i>                                                                                    | 125/250 µg/mL                | 37°C, 24h               |                                                                                                                                                         |            |
|                               |           |                                       |                    | <i>X. phaseoli</i>                                                                                | 125/500 µg/mL                | 37°C, 24h               |                                                                                                                                                         |            |
|                               |           |                                       |                    |                                                                                                   |                              |                         |                                                                                                                                                         |            |
| <i>Cedrus deodara</i>         | leaves    | Ethanol                               | Phenolic compounds | <i>B. subtilis</i>                                                                                | 62.5/125 µg/mL               | 37°C, 24h               | Ethanol extract shows activity ranges from 45-72%.                                                                                                      | [3]        |
|                               |           |                                       |                    | <i>A. tumefaciens</i>                                                                             | 125/na µg/mL                 | 37°C, 24h               |                                                                                                                                                         |            |

|                               |             |                 |                                                          |                                       |                 |             |                                                                                                              |     |
|-------------------------------|-------------|-----------------|----------------------------------------------------------|---------------------------------------|-----------------|-------------|--------------------------------------------------------------------------------------------------------------|-----|
| <i>Cephalotaxus griffithi</i> | leaves      | Methanol        | Phenolic compounds                                       | <i>E. chrysanthemi</i>                | 125/250 µg/mL   | 37°C, 24h   | Methanol extract shows potency against all the bacteria with activity range from 54 % to 81% total activity. | [3] |
|                               |             |                 |                                                          | <i>X. phaseoli</i>                    | 250/na µg/mL    | 37°C, 24h   |                                                                                                              |     |
|                               |             |                 |                                                          | <i>E. coli</i>                        | 62.5/125 µg/mL  | 37°C, 24h   |                                                                                                              |     |
|                               |             |                 |                                                          | <i>A. tumefaciens</i>                 | 62.5/125 µg/mL  | 37°C, 24h   |                                                                                                              |     |
|                               |             |                 |                                                          | <i>B. subtilis</i>                    | 62.5/250 µg/mL  | 37°C, 24h   |                                                                                                              |     |
|                               |             |                 |                                                          | <i>E. coli</i>                        | 125/500 µg/mL   | 37°C, 24h   |                                                                                                              |     |
|                               |             |                 |                                                          | <i>E. chrysanthemi</i>                | 125/250 µg/mL   | 37°C, 24h   |                                                                                                              |     |
| <i>Cryptomeria japonica</i>   | all parts   | Methanol        | Phenolic compounds                                       | <i>X. phaseoli</i>                    | 250/250 µg/mL   | 37°C, 24h   | <i>C. japonica</i> methanol extracts each part except for pollen showed strong activities                    | [4] |
|                               |             |                 |                                                          | <i>Staphylococcus aureus</i>          | 1600 µg/mL      | 37°C, 24h   |                                                                                                              |     |
| <i>A. japonica</i>            | leaves      | Methanol        | Phenolic compounds                                       | <i>B. subtilis</i>                    | 250/500 µg/mL   | 37°C, 24h   | Methanol extract shows potency against all the bacteria with activity range from 54 to 81% total activity.   | [3] |
|                               |             |                 |                                                          | <i>E. coli</i>                        | 250/500 µg/mL   | 37°C, 24h   |                                                                                                              |     |
|                               |             |                 |                                                          | <i>X. phaseoli</i>                    | 250/500 µg/mL   | 37°C, 24h   |                                                                                                              |     |
| <i>C. sempervirens</i>        | aerial part | Methanol        | Phenolic compounds                                       | <i>Enterococcus faecalis</i>          | 250/250 µg/mL   | 37°C, 24 h  | Plant extract shows good antibacterial activity                                                              | [5] |
|                               |             |                 |                                                          | <i>Staphlococcus aureus</i>           | 125 /125 µg/mL  | 37°C, 24 h  |                                                                                                              |     |
|                               |             |                 |                                                          | <i>K. pneumonia</i>                   | 62.5/62.5 µg/mL | 37°C, 24 h  |                                                                                                              |     |
|                               |             |                 |                                                          | <i>Pseudomonas aeruginosa</i>         | 125/125 µg/mL   | 37°C, 24 h  |                                                                                                              |     |
|                               |             |                 |                                                          | <i>Salmonella indica</i>              | 125/125 µg/mL   | 37°C, 24 h  |                                                                                                              |     |
| <i>Juniperus communis</i>     | berry       | Alcohol / Water | Flavanoids (quercetin, rutin, apigenin) chlorogenic acid | <i>Penicillium hirsutum, A. niger</i> | 50 µL/mL        | 37°C, 84 h. | Berry extract shows good antifungal activity                                                                 | [6] |
| <i>Juniperus communis</i>     | leaves      | hexane          | Phenolic compounds                                       | <i>B. subtilis</i>                    | 40 µL/mL        | 37°C, 24 h  | Hexane extract shows maximum zone of inhibition against bacteria with 16-21 mm                               | [7] |
|                               |             |                 |                                                          | <i>E. coli</i>                        | 40 µL/mL        | 37°C, 24 h  |                                                                                                              |     |
|                               |             |                 |                                                          | <i>A. tumefaciens</i>                 | 40 µL/mL        | 37°C, 24 h  |                                                                                                              |     |
|                               |             |                 |                                                          | <i>E. chrysanthemi</i>                | 40 µL/mL        | 37°C, 24 h  |                                                                                                              |     |
|                               |             |                 |                                                          | <i>X. phaseoli</i>                    | 250/500 µg/mL   | 37°C, 84 h  |                                                                                                              |     |

|                      |      |                                             |                                                             |                                                                                                                                                                                                                                                            |                   |                               |                                                                                                                                                                                                                                                                                                                                                                                             |      |
|----------------------|------|---------------------------------------------|-------------------------------------------------------------|------------------------------------------------------------------------------------------------------------------------------------------------------------------------------------------------------------------------------------------------------------|-------------------|-------------------------------|---------------------------------------------------------------------------------------------------------------------------------------------------------------------------------------------------------------------------------------------------------------------------------------------------------------------------------------------------------------------------------------------|------|
| <i>Picea abies</i>   | bark | diethyl ether                               | Hydroxystilbene, resveratrol, isorhapontigenin, piceatannol | <i>Antrodia sinuosa</i> , <i>Phlebiopsis gigantea</i> , <i>Serpula himantoides</i> , <i>Antrodia xantha</i> , <i>G. sepiarium</i> , <i>Fomitopsis pinicola</i> , <i>Coniophora puteana</i> , <i>Heterobasidion parviporum</i> and <i>Serpula lacrymans</i> | 8 and 15 mg/L     | NF                            | Compound piceatannol and isorhapontigenin as compared to resveratrol showed best antifungal activity in brown rot fungi                                                                                                                                                                                                                                                                     | [8]  |
|                      |      | Ethanol / Water                             | Stilbenoids                                                 | <i>S. aureus</i> and <i>Candida albicans</i>                                                                                                                                                                                                               | 33.33 mg/mL       | 35°C, 24 h;<br>25°C, 48–72 h. | <i>Picea abies</i> bark extracts exhibited growth inhibition against <i>S. aureus</i> and <i>C. albicans</i>                                                                                                                                                                                                                                                                                | [9]  |
| <i>P. mariana</i>    | bark | Water                                       | Phenolic compounds                                          | <i>E. coli</i>                                                                                                                                                                                                                                             | 1.67 mg/mL        | 37°C, 24 h.                   | OPF displayed best antimicrobial                                                                                                                                                                                                                                                                                                                                                            | [10] |
|                      |      | Oligomeric proanthocyanidins fraction (OPF) |                                                             | <i>E. coli</i>                                                                                                                                                                                                                                             | 0.83 / 4.44 mg/mL | 37°C, 24 h.                   | Activity as compared to WE                                                                                                                                                                                                                                                                                                                                                                  |      |
| <i>P. smithiana</i>  | bark | Methanol/ethanol                            | Alkaloids, flavonoids, tannins and phenols                  | <i>A. tumefaciens</i> , <i>B. subtilis</i> , <i>E. coli</i> , <i>E. chrysanthemi</i> and <i>X. phaseoli</i>                                                                                                                                                | 31.25-250 µg/mL   | 37°C, overnight               | Both the extracts of <i>P. smithiana</i> showed a significant zone of inhibition ranging from 9-19 mm (ZOI). The results showed that methanol extract has more antimicrobial potential than ethanol, highest in <i>Agrobacterium tumefaciens</i> . The lowest value of MIC and MBC were recorded against <i>A. tumefaciens</i> in methanol extract 31.25 µg/mL and 62.5 µg/mL respectively. | [11] |
| <i>P. gerardiana</i> | bark | Ethanol                                     | flavonoids                                                  | <i>P. aeruginosa</i>                                                                                                                                                                                                                                       | 1500 µg/mL        | 37°C, 24 h                    | PG extract shows antibacterial zone of inhibition with 10.5 and                                                                                                                                                                                                                                                                                                                             | [12] |

|                           |            |          |                                     |                                                                                                                                    |                                                                             |                 |                                                                                                                                            |      |
|---------------------------|------------|----------|-------------------------------------|------------------------------------------------------------------------------------------------------------------------------------|-----------------------------------------------------------------------------|-----------------|--------------------------------------------------------------------------------------------------------------------------------------------|------|
|                           |            |          |                                     |                                                                                                                                    |                                                                             |                 | antifungal activity with 15.01mm zone of inhibition                                                                                        |      |
| <i>P. roxburghii</i>      | bark       | Ethanol  | flavonoids                          | Bacteria                                                                                                                           | (µg/mL)                                                                     | 37°C, 24 h      | PR extract shows antibacterial and antifungal activity with 10.2 to 13.2 and 15.3 mm zone of inhibition respectively                       | [12] |
|                           |            |          |                                     | <i>P. aeruginosa</i>                                                                                                               | NF                                                                          |                 |                                                                                                                                            |      |
|                           |            |          |                                     | <i>S. aureus</i>                                                                                                                   | 1000-1500 µg/mL                                                             |                 |                                                                                                                                            |      |
|                           |            |          |                                     | <i>E. coli</i>                                                                                                                     | NF                                                                          |                 |                                                                                                                                            |      |
|                           |            |          |                                     | <i>K. pneumonia</i>                                                                                                                | 1000-1500 µg/mL                                                             |                 |                                                                                                                                            |      |
|                           |            |          |                                     | <i>C. albicans</i>                                                                                                                 | 1500 µg/mL                                                                  |                 |                                                                                                                                            |      |
| <i>P. wallichiana</i>     | bark       | Ethanol  | flavonoids                          | Bacteria                                                                                                                           |                                                                             | 37°C, 24 h      | PW extract shows antibacterial activity with zone of inhibition 10.12 to 14.21 mm and antifungal with 18.93 mm                             | [12] |
|                           |            |          |                                     | <i>P. aeruginosa</i>                                                                                                               | 1000-1500 µg/mL                                                             |                 |                                                                                                                                            |      |
|                           |            |          |                                     | <i>S. aureus</i>                                                                                                                   | 1000-1500 µg/mL                                                             |                 |                                                                                                                                            |      |
|                           |            |          |                                     | <i>K. pneumonia</i>                                                                                                                | 1000-1500 µg/mL                                                             |                 |                                                                                                                                            |      |
|                           |            |          |                                     | <i>C. albicans</i>                                                                                                                 | 1500 µg/mL                                                                  |                 |                                                                                                                                            |      |
|                           |            |          |                                     |                                                                                                                                    |                                                                             | 25°C, 72h       |                                                                                                                                            |      |
| <i>Pinus wallichiana</i>  | leaves     | Methanol | flavonoids, phenols                 | <i>A. tumefaciens</i>                                                                                                              | 250/500 µg/mL                                                               | 37°C, 24h       | Extract shows significant antibacterial activity                                                                                           | [3]  |
|                           |            |          |                                     | <i>B. subtilis</i>                                                                                                                 | 500/500 µg/mL                                                               | 37°C, 24h       |                                                                                                                                            |      |
|                           |            |          |                                     | <i>E. coli</i>                                                                                                                     | 500/na µg/mL                                                                | 37°C, 24h       |                                                                                                                                            |      |
|                           |            |          |                                     | <i>E. chrysanthemi</i>                                                                                                             | 500/500 µg/mL                                                               | 37°C, 24h       |                                                                                                                                            |      |
|                           |            |          |                                     | <i>X. phaseoli</i>                                                                                                                 | 500/na µg/mL                                                                | 37°C, 24h       |                                                                                                                                            |      |
| <i>Taxus baccata</i>      | leaves     | Ethanol  | flavonoids, phenols                 | <i>A. tumefaciens</i>                                                                                                              | 250/500 µg/mL                                                               | 37°C, 24h       | Extract shows significant antibacterial activity                                                                                           | [3]  |
|                           |            |          |                                     | <i>B. subtilis</i>                                                                                                                 | 250/500 µg/mL                                                               | 37°C, 24h       |                                                                                                                                            |      |
|                           |            |          |                                     | <i>E. coli</i>                                                                                                                     | 250/500 µg/mL                                                               | 37°C, 24h       |                                                                                                                                            |      |
|                           |            |          |                                     | <i>E. chrysanthemi</i>                                                                                                             | 250/500 µg/mL                                                               | 37°C, 24h       |                                                                                                                                            |      |
|                           |            |          |                                     | <i>X. phaseoli</i>                                                                                                                 | 250/500 µg/mL                                                               | 37°C, 24h       |                                                                                                                                            |      |
| <i>Thuja occidentalis</i> | leaves     | Methanol | flavonoids, phenols                 | <i>P. auregenosa</i> , <i>Salmonella</i> , <i>B. subtilis</i> , <i>Bacillus cereus</i> , <i>A. niger</i> and <i>Candida krusie</i> | 100, 150, 200 and 250 mg/mL                                                 | 37°C, 24-48 h   | Shows good antimicrobial activity                                                                                                          | [13] |
| <i>Taxus wallichiana</i>  | Leaf, stem | Methanol | Polyphenols, flavanoids, terpenoids | <i>S. aureus</i> , <i>E. coli</i>                                                                                                  | LC <sub>50</sub> (µg/mL)<br>Leaves =601.17<br>Stem= (3.56×10 <sup>8</sup> ) | 37°C, overnight | Stem of <i>T. wallichiana</i> showed significant zone of inhibition against gram positive bacteria while the leaf of <i>T. wallichiana</i> | [14] |

---

did not show significant zone of  
inhibition against both gram  
positive and gram negative  
bacteria

---

NF-Not found; na-not active

## Reference

1. Freitas, A.M.; Almeida, M.T.R.; Andrighetti-Fröhner, C.R.; Cardozo, F.T.G.S.; Barardi, C.R.M.; Farias, M.R.; Simões, C.M.O. Antiviral activity-guided fractionation from *Araucaria angustifolia* leaves extract. *J. Ethnopharmacol.* **2009**, *126*, 512–517, doi:10.1016/j.jep.2009.09.005.
2. Banerjee, S.; Das, A.; Chakraborty, P.; Suthindhiran, K.; Jayasri, M.A. Antioxidant and antimicrobial activity of *Araucaria cookii* and *Brassaia actinophylla*. *Pakistan J. Biol. Sci.* **2014**, *17*, 715–719, doi:10.3923/pjbs.2014.715.719.
3. Joshi, S.; Sati, S.C.; Kumar, P. Antibacterial potential and ethnomedical relevance of Kumaun Himalayan Gymnosperms. *J. Phytopharm.* **2016**, *5*, 190–200.
4. Horiba, H.; Nakagawa, T.; Zhu, Q.; Ashour, A.; Watanabe, A.; Shimizu, K. Biological activities of extracts from different parts of *cryptomeria japonica*. *Nat. Prod. Commun.* **2016**, *11*, 1337–1342, doi:10.1177/1934578x1601100939.
5. Selim, S.A.; Adam, M.E.; Hassan, S.M.; Albalawi, A.R. Chemical composition, antimicrobial and antibiofilm activity of the essential oil and methanol extract of the Mediterranean cypress (*Cupressus sempervirens* L.). *BMC Complement. Altern. Med.* **2014**, *14*, 1–8, doi:10.1186/1472-6882-14-179.
6. Fierascu, I.; Ungureanu, C.; Avramescu, S.M.; Cimpeanu, C.; Georgescu, M.I.; Fierascu, R.C.; Ortan, A.; Sutan, A.N.; Anuta, V.; Zangfirescu, A.; et al. Genoprotective, antioxidant, antifungal and anti-inflammatory evaluation of hydroalcoholic extract of wild-growing *Juniperus communis* L. (Cupressaceae) native to Romanian southern sub-Carpathian hills. *BMC Complement. Altern. Med.* **2018**, *18*, 1–15, doi:10.1186/s12906-017-2066-8.
7. Sati, S.C.; Joshi, S.; Campus, D.S.B. Antibacterial potential of leaf extracts of *Juniperus communis* L. from Kumaun Himalaya. *African J. Microbiol. Res.* **2010**, *4*, 1291–1294.
8. Hedenström, E.; Fagerlund Edfeldt, A.; Edman, M.; Jonsson, B.G. Resveratrol, piceatannol, and isorhapontigenin from Norway spruce (*Picea abies*) debarking wastewater as inhibitors on the growth of nine species of wood-decaying fungi. *Wood Sci. Technol.* **2016**, *50*, 617–629, doi:10.1007/s00226-016-0814-4.
9. Välimaa, A.L.; Raitanen, J.E.; Tienaho, J.; Sarjala, T.; Nakayama, E.; Korpinen, R.; Mäkinen, S.; Eklund, P.; Willför, S.; Jyske, T. Enhancement of Norway spruce bark side-streams: Modification of bioactive and protective properties of stilbenoid-rich extracts by UVA-irradiation. *Ind. Crops Prod.* **2020**, *145*, 112150, doi:10.1016/j.indcrop.2020.112150.
10. St-Pierre, A.; Blondeau, D.; Bourdeau, N.; Bley, J.; Desgagné-Penix, I. Chemical Composition of Black Spruce (*Picea mariana*) Bark Extracts and Their Potential as Natural Disinfectant. *Ind. Biotechnol.* **2019**, *15*, 219–231, doi:10.1089/ind.2019.0007.
11. Kumar, P. Ph ton. **2015**.
12. Sharma, A.; Goyal, R.; Sharma, L. Potential biological efficacy of *Pinus* plant species against oxidative, inflammatory and microbial disorders. *BMC Complement. Altern. Med.* **2016**, *16*, 1–11, doi:10.1186/s12906-016-1011-6.
13. Deepika Tekaday; Reena Antony; Sourabh Jain Antimicrobial, antioxidant and phytochemical investigation of *Thuja occidentalis* (Arbor vitae) leave extract. *GSC Biol. Pharm. Sci.* **2020**, *12*, 108–116, doi:10.30574/gscbps.2020.12.3.0292.
14. Subba, B. Analysis of Phytochemical Constituents and Biological Activity of *Taxus Wallichiana* Zucc. Dolakha District of Nepal. *Int. J. Appl. Sci. Biotechnol.* **2018**, *6*, 110–114, doi:10.3126/ijasbt.v6i2.20410.
